# Supplementary material
Source: PubMed Central journal article supplement (PMC7964639)
Supplement: 3341_tables.pdf [file 3341_tables.pdf]

**On-line Table 1: Patient characteristics, imaging studies and infarct detection**

| Patient       | Sex | Mutation Type <sup>a</sup>      | Mean Age at Scan (yr) | Length Follow-Up (yr) | No. of Scans | CTA |      |      | MRA  |      | 3-Vessel Angiogram | Evidence for Infarct on Imaging | Infarct on 1st Available Imaging | Age at 1st Imaging |    |
|---------------|-----|---------------------------------|-----------------------|-----------------------|--------------|-----|------|------|------|------|--------------------|---------------------------------|----------------------------------|--------------------|----|
|               |     |                                 |                       |                       |              | CT  | Head | Neck | Head | Neck |                    |                                 |                                  |                    |    |
| 1             | F   | Nonclassic c.1968 + 1G>A        | 8.2                   | 0.4                   | 5            | 5   |      |      |      |      |                    | +                               | +                                | 8.0                |    |
| 2             | M   | Presumed classic                | 10.8                  | 0                     | 1            | 1   |      |      |      |      |                    |                                 |                                  |                    |    |
| 3             | M   | Classic                         | 6.5                   | 1.4                   | 12           | 4   |      | 5    | 2    | 1    |                    | +                               | +                                | 5.7                |    |
| 4             | M   | Classic                         | 9.4                   | 0.4                   | 4            |     |      | 2    | 1    | 1    |                    |                                 |                                  |                    |    |
| 5             | M   | Classic                         | 10.2                  | 0                     | 3            |     |      | 1    | 1    | 1    |                    | +                               | +                                | 10.2               |    |
| 6             | M   | Presumed classic                | 11.1                  | 3.4                   | 14           | 9   | 1    | 2    | 1    | 1    |                    | +                               |                                  | 10.7               |    |
| 7             | F   | Classic                         | 12.2                  | 0                     | 2            |     |      | 1    | 1    |      |                    |                                 |                                  |                    |    |
| 8             | M   | Classic                         | 6.9                   | 10.3                  | 4            | 2   |      | 2    |      |      |                    | +                               |                                  | 10.3               |    |
| 9             | M   | Classic                         | 12                    | 2.6                   | 9            | 1   |      | 3    | 3    | 2    |                    | +                               | +                                | 10.5               |    |
| 10            | M   | Presumed nonclassic             | 3.9                   | 4.8                   | 8            | 3   |      | 4    | 1    |      |                    | +                               | +                                | 4.9                |    |
| 11            | F   | Classic                         | 6.7                   | 7.3                   | 5            | 2   |      | 3    |      |      |                    | +                               |                                  | 7.5                |    |
| 12            | F   | Classic                         | 2.6                   | 3.8                   | 9            | 5   |      | 4    |      |      |                    |                                 |                                  |                    |    |
| 13            | F   | Presumed classic                | 4.3                   | 0                     | 1            | 1   |      |      |      |      |                    |                                 |                                  |                    |    |
| 14            | M   | Classic                         | 0.4                   | 0.5                   | 2            | 1   |      | 1    |      |      |                    |                                 |                                  |                    |    |
| 15            | F   | Classic                         | 7.9                   | 1.6                   | 3            |     |      | 3    |      |      |                    | +                               | +                                | 6.4                |    |
| 16            | M   | Heterozygous c.1822 G>A (G608S) | 1.3                   | 0                     | 2            |     |      | 1    | 1    |      |                    |                                 |                                  |                    |    |
| 17            | F   | Classic                         | 6.8                   | 2.7                   | 7            | 1   |      | 4    | 2    |      |                    | +                               | +                                | 5.8                |    |
| 18            | F   | Classic                         | 0.9                   | 1                     | 6            |     |      | 2    | 2    | 2    |                    | +                               | +                                | 0.4                |    |
| 19            | F   | Classic                         | 6.9                   | 0.5                   | 2            |     |      | 1    |      |      | 1                  |                                 |                                  |                    |    |
| 20            | M   | Classic                         | 2.1                   | 0                     | 1            | 1   |      |      |      |      |                    |                                 |                                  |                    |    |
| 21            | M   | Classic                         | 9.4                   | 0.1                   | 4            | 1   | 1    | 1    |      |      |                    | +                               | +                                | 9.3                |    |
| 22            | M   | Classic                         | 7.8                   | 3.8                   | 10           | 4   |      | 3    | 2    |      | 1                  | +                               | +                                | 6.1                |    |
| 23            | M   | Classic                         | 1.9                   | 2.6                   | 4            |     |      | 3    | 1    |      |                    | +                               |                                  | 1.8                |    |
| 24            | F   | Classic                         | 7.2                   | 2.7                   | 7            | 1   |      | 4    | 1    | 1    |                    | +                               | +                                | 5.0                |    |
| 25            | F   | Heterozygous c.1822 G>A (G608S) | 0.4                   | 0.4                   | 1            |     |      | 1    |      |      |                    |                                 |                                  |                    |    |
| Column Totals |     |                                 |                       |                       |              | 126 | 42   | 2    | 1    | 51   | 19                 | 9                               | 2                                | 15                 | 11 |

**Note:**—+ indicates present.

<sup>a</sup> Classic indicates a heterozygous c.1824 C>T (G608G) mutation.

**On-line Table 2: Neurovascular imaging**

|                                               | Present (No.)<br>(% Visualized) | Absent<br>(No.) | N/V<br>(No.) |
|-----------------------------------------------|---------------------------------|-----------------|--------------|
| Vessel characteristics                        |                                 |                 |              |
| Cervical CCA stenosis                         | 1 (10%)                         | 9               | 15           |
| Cervical ICA stenosis                         | 3 (30%)                         | 7               | 15           |
| CCA, cervical ICA, ECA calcification          | 1 (50%)                         | 2               | 12           |
| Proximal cervical VA stenosis                 | 1 (11%)                         | 8               | 16           |
| Cervical VA calcification                     | 1 (10%)                         | 9               | 16           |
| Distal V2/V3 segment VA stenosis/occlusion    | 9 (82%)                         | 2               | 14           |
| Precavernous ICA stenosis/occlusion           | 11 (85%)                        | 2               | 12           |
| Cavernous ICA stenosis/occlusion              | 12 (92%)                        | 1               | 12           |
| Supraclinoid ICA stenosis/occlusion           | 7 (54%)                         | 6               | 12           |
| ACA stenosis/occlusion                        | 8 (62%)                         | 5               | 12           |
| MCA stenosis/occlusion                        | 6 (46%)                         | 7               | 12           |
| PCA stenosis/occlusion                        | 2 (14%)                         | 12              | 11           |
| BA stenosis/occlusion <sup>a</sup>            | 0 (0%)                          |                 |              |
| V4 segment VA stenosis/occlusion <sup>a</sup> | 0 (0%)                          |                 |              |
| Vessel prominence due to collateralization    |                                 |                 |              |
| Cortical collateral venous flow               | 14 (67%)                        | 7               | 4            |
| Suprasellar cistern collaterals               | 12 (63%)                        | 7               | 6            |
| Subfrontal collaterals                        | 11 (58%)                        | 8               | 6            |
| Perisplenic collaterals                       | 2 (15%)                         | 11              | 12           |
| Enlarged MMA                                  | 5 (45%)                         | 6               | 14           |
| Enlarged IMA                                  | 6 (55%)                         | 5               | 14           |
| Enlarged deep cervical arteries               | 7 (78%)                         | 2               | 16           |
| Enlarged occipital arteries                   | 7 (70%)                         | 3               | 15           |
| Enlarged ascending cervical arteries          | 4 (40%)                         | 6               | 15           |
| Enlarged ASA                                  | 8 (80%)                         | 2               | 15           |
| Enlarged posterior spinal artery              | 3 (30%)                         | 7               | 15           |

**Note:**—N/V indicates feature not well-visualized; BA, basilar artery; ECA, external carotid artery; IMA, internal maxillary artery; MMA, middle meningeal artery.

<sup>a</sup> Not identified, but no overall number noted
